# Supplementary material
Source: publisher figshare collection journal article supplement (https://aacr.figshare.com/articles/dataset/_/22539712)
Supplement: Supplementary file 1 [file 40003036]

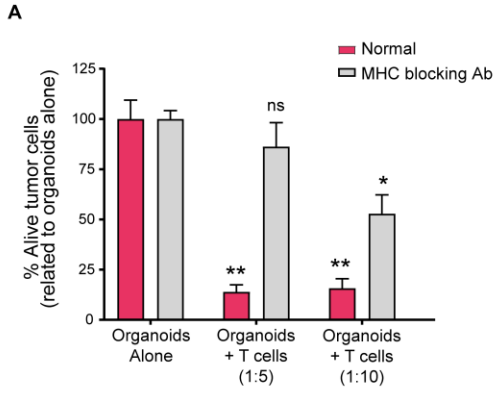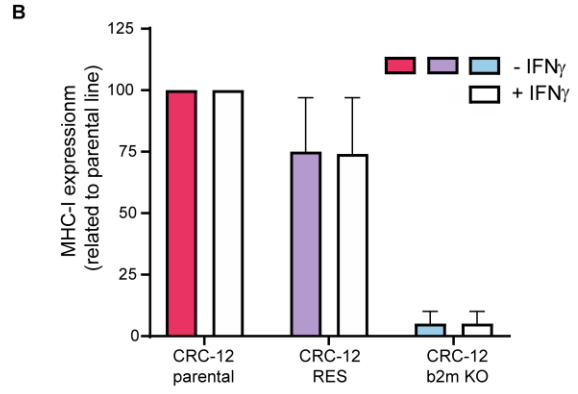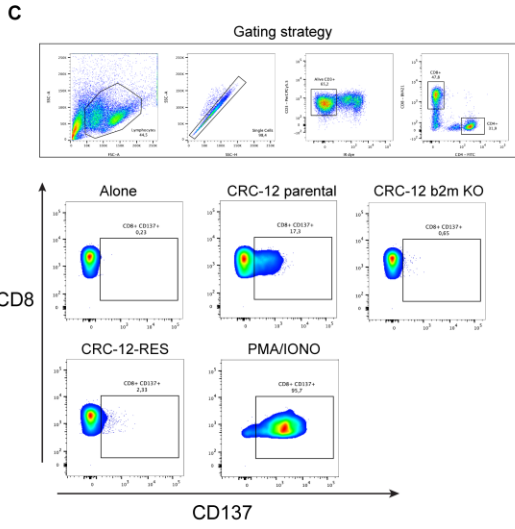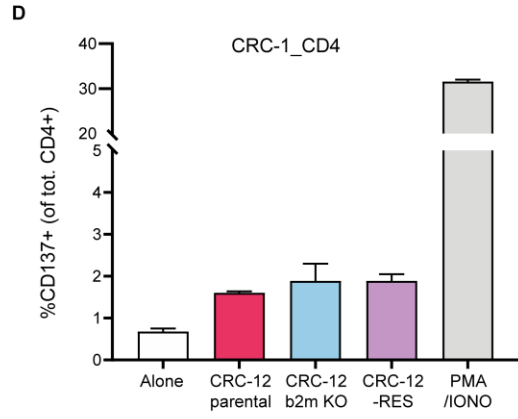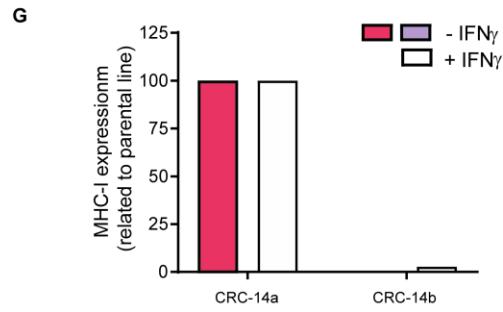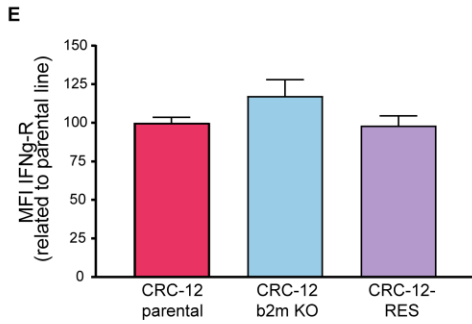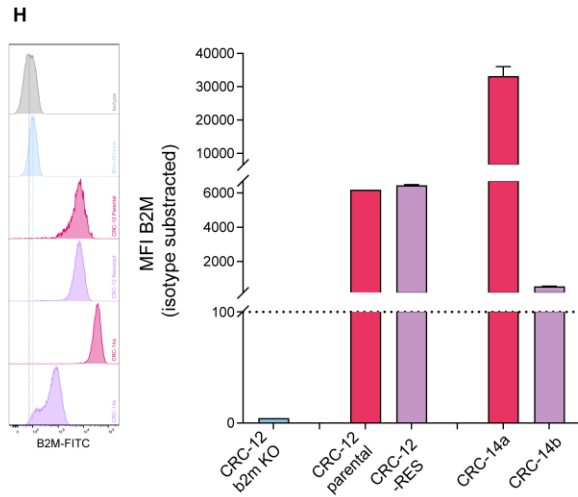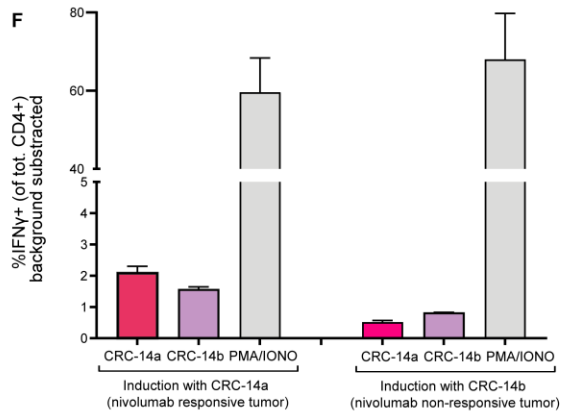

**Supplementary Figure S5. Validation experiments in patient-derived dMMR/MSI tumor organoid-T cell co-culture system.** **A**, CRC-12 parental organoids viability upon T cell co-culture with luciferase reporter assay. Error bars represent the mean and SEM of at least two biological replicates. Significance was determined by two-tailed Student's *t* test. ns, not significant; \*\*  $P \leq 0.01$  and \*\*\*  $P \leq 0.001$ . **B**, Cell surface MHC class I expression in CRC-12, CRC-12-RES and CRC-12-B2M knockout cells as determined by flow cytometry. Organoids were stimulated with 200 ng/mL IFN $\gamma$  for 24 hr or were left unstimulated. Bar graphs indicate median fluorescence intensity (MFI) of anti-HLA-A, -B, and -C-PE minus MFI of isotype control, normalized to the parental line. Error bars represent SEM of at least two independent experiments. **C**, Flow cytometry gating strategies and representative plots of CD8 $^+$  T cells tested for tumor reactivity after 2 weeks of co-culture with autologous CRC-12 organoids. T cells were re-stimulated with CRC-12 organoids and evaluated for cell surface staining of CD137. PMA/ionomycin stimulation was included as a positive control. **D**, CD137 expression by CD4 $^+$  T cells obtained by 2-week co-culture with autologous CRC-12 tumor organoids, on stimulation with CRC-12 organoids. Bars represent the mean and SEM of two biologically independent experiments. **E**, Cell surface IFN $\gamma$  receptor expression of CRC-12, CRC-12-RES and CRC-12-B2M KO organoid lines as determined by flow cytometry. Error bars represent the mean and SEM of at least two biological replicates. **F**, Quantification of IFN $\gamma$ -positive CD4 T cells induced by 2-week co-culture of PBMCs with CRC-14a (responsive) or CRC-14b (non-responsive) organoids derived from the CRC-14 patient. T cells were re-stimulated with CRC-14a (left) or CRC-14b (right) organoids and evaluated for intracellular staining of IFN $\gamma$ . Background IFN $\gamma$ -positive cells (in unstimulated condition) were subtracted from the signal. Data represent the mean and SEM of at least 2 independent experiments. **G**, Cell surface MHC class I expression in CRC-14a and CRC-14b determined by flow cytometry. Organoids were stimulated with 200 ng/mL IFN $\gamma$  for 24 hr or were left unstimulated. Bar graphs indicate median fluorescence intensity (MFI) of anti-HLA-A, -B, and -C-PE minus MFI of isotype control, normalized to the parental line. Error bars represent SEM of at least two independent experiments. **H**, Cell surface B2M expression of CRC-12-B2M KO, CRC-12, CRC-12-RES, CRC-14a and, CRC-14b organoid lines as determined by flow cytometry. Error bars represent the mean and SEM of at least two biological replicates.
